# Supplementary material for: Bottom-up mass spectrometric sequencing of microRNA
Source: Royal Society of Chemistry journal article supplement (doi:10.1039/c4ay01519c), 2014-01-01
Supplement: c4ay01519c2.pdf [file c4ay01519c2.pdf]

**Table S1**

| <b>5' Fragments of miR-183-5p</b> | <b>Theoretical Mass (m/z)</b> | <b>Observed Mass (m/z)</b> | <b>Mass Difference (m/z)</b> | <b>Mass Accuracy (ppm)</b> |
|-----------------------------------|-------------------------------|----------------------------|------------------------------|----------------------------|
| pUAUGp'                           | 1367.1242                     | 1367.1172                  | 0.0070                       | 5.090979                   |
| pUAUGGp'                          | 1712.1716                     | 1712.1729                  | -0.0013                      | -0.759270                  |
| pUAUGGCp'                         | 2017.2129                     | 2017.2159                  | -0.0030                      | -1.492158                  |
| pUAUGGCp'                         | 2346.2654                     | 2346.2705                  | -0.0051                      | -2.173667                  |
| pUAUGGCACp'                       | 2651.3067                     | 2651.3093                  | -0.0026                      | -0.984420                  |
| pUAUGGCACUp'                      | 2957.3320                     | 2957.3374                  | -0.0054                      | -1.829352                  |
| pUAUGGCACUGp'                     | 3302.3794                     | 3302.3876                  | -0.0082                      | -2.473974                  |
| pUAUGGCACUGGp'                    | 3647.4269                     | 3647.4352                  | -0.0083                      | -2.286543                  |
| pUAUGGCACUGGUp'                   | 3953.4522                     | 3953.4600                  | -0.0078                      | -1.983077                  |
| pUAUGGCACUGGUAp'                  | 4282.5047                     | 4282.5100                  | -0.0053                      | -1.242264                  |
| pUAUGGCACUGGUAGp'                 | 4627.5521                     | 4627.5561                  | -0.0040                      | -0.860066                  |
| pUAUGGCACUGGUAGAp'                | 4956.6046                     | 4956.6056                  | -0.0010                      | -0.193681                  |
| pUAUGGCACUGGUAGAAp'               | 5285.6572                     | 5285.6617                  | -0.0045                      | -0.858928                  |
| pUAUGGCACUGGUAGAAUp'              | 5591.6825                     | 5591.6681                  | 0.0144                       | 2.568100                   |
| pUAUGGCACUGGUAGAAUUp'             | 5897.7078                     | 5897.6658                  | 0.0420                       | 7.114629                   |
| pUAUGGCACUGGUAGAAUUCp'            | 6202.7491                     | 6202.7592                  | -0.0102                      | -1.636371                  |
| pUAUGGCACUGGUAGAAUUCAp'           | 6531.8016                     | 6531.7544                  | 0.0472                       | 7.221591                   |
| pUAUGGCACUGGUAGAAUUCACp'          | 6836.8429                     | 6836.8081                  | 0.0347                       | 5.082755                   |
| pUAUGGCACUGGUAGAAUUCACU           | 7080.91239                    | 7080.8793                  | 0.0331                       | 4.673127                   |
|                                   |                               |                            |                              | RMS = 3.4                  |

**Table S2**

| <b>3' Fragments of miR-183-5p</b> | <b>Theoretical Mass<br/>(m/z)</b> | <b>Observed Mass<br/>(m/z)</b> | <b>Mass Difference<br/>(m/z)</b> | <b>Mass Accuracy<br/>(ppm)</b> |
|-----------------------------------|-----------------------------------|--------------------------------|----------------------------------|--------------------------------|
| UCACU                             | 1490.2372                         | 1490.2265                      | 0.0107                           | 7.186775                       |
| UUCACU                            | 1796.2625                         | 1796.2595                      | 0.0030                           | 1.675702                       |
| AUUCACU                           | 2125.3150                         | 2125.3164                      | -0.0014                          | -0.644610                      |
| AAUUCACU                          | 2454.3676                         | 2454.3708                      | -0.0033                          | -1.324170                      |
| GAAUUCACU                         | 2799.4150                         | 2799.4186                      | -0.0036                          | -1.293127                      |
| AGAAUUCACU                        | 3128.4675                         | 3128.4737                      | -0.0062                          | -1.981801                      |
| UAGAAUUCACU                       | 3434.4928                         | 3434.4959                      | -0.0031                          | -0.902608                      |
| GUAGAAUUCACU                      | 3779.5402                         | 3779.5492                      | -0.0090                          | -2.370659                      |
| GGUAGAAUUCACU                     | 4124.5877                         | 4124.5976                      | -0.0099                          | -2.407513                      |
| UGGUAGAAUUCACU                    | 4430.6130                         | 4430.6103                      | 0.0027                           | 0.602625                       |
| CUGGUAGAAUUCACU                   | 4735.6543                         | 4735.6565                      | -0.0022                          | -0.473008                      |
| ACUGGUAGAAUUCACU                  | 5064.7068                         | 5064.7033                      | 0.0035                           | 0.687108                       |
| CACUGGUAGAAUUCACU                 | 5369.7481                         | 5369.7442                      | 0.0039                           | 0.720704                       |
| GCACUGGUAGAAUUCACU                | 5714.7955                         | 5714.7768                      | 0.0187                           | 3.272208                       |
| GGCACUGGUAGAAUUCACU               | 6059.8429                         | 6059.8235                      | 0.0194                           | 3.206354                       |
| UGGCACUGGUAGAAUUCACU              | 6365.8682                         | 6365.8665                      | 0.0017                           | 0.273333                       |
| AUGGCACUGGUAGAAUUCACU             | 6694.9208                         | 6694.9026                      | 0.0182                           | 2.712504                       |
| pUAUGGCACUGGUAGAAUUCACU           | 7080.91239                        | 7080.8793                      | 0.0331                           | 4.673127                       |
|                                   |                                   |                                |                                  | RMS = 2.6                      |

**Table S3**

| <b>5' Fragments of miR-124a</b> | <b>Theoretical Mass<br/>(m/z)</b> | <b>Observed Mass<br/>(m/z)</b> | <b>Mass Difference<br/>(m/z)</b> | <b>Mass Accuracy<br/>(ppm)</b> |
|---------------------------------|-----------------------------------|--------------------------------|----------------------------------|--------------------------------|
| pUUAAp'                         | 1351.1293                         | 1351.1265                      | 0.0027                           | 2.035335                       |
| pUUAAGp'                        | 1696.1767                         | 1696.1762                      | 0.0005                           | 0.282989                       |
| pUUAAGGp'                       | 2041.2241                         | 2041.2213                      | 0.0028                           | 1.381524                       |
| pUUAAGGCp'                      | 2346.2654                         | 2346.2657                      | -0.0003                          | -0.127863                      |
| pUUAAGGCp'                      | 2675.3179                         | 2675.3159                      | 0.0020                           | 0.755050                       |
| pUUAAGGCACp'                    | 2980.3592                         | 2980.3606                      | -0.0014                          | -0.466387                      |
| pUUAAGGCACGp'                   | 3325.4066                         | 3325.4066                      | 0.0000                           | 0.012029                       |
| pUUAAGGCACGCGp'                 | 3630.4479                         | 3630.4424                      | 0.0055                           | 1.523228                       |
| pUUAAGGCACGCGGp'                | 3975.4954                         | 3975.4936                      | 0.0018                           | 0.445228                       |
| pUUAAGGCACGCGGp'                | 4320.5428                         | 4320.5307                      | 0.0121                           | 2.800574                       |
| pUUAAGGCACGCGGUp'               | 4626.5681                         | 4626.5604                      | 0.0077                           | 1.664301                       |
| pUUAAGGCACGCGGUGp'              | 4971.6155                         | 4971.5957                      | 0.0198                           | 3.990655                       |
| pUUAAGGCACGCGGUGAp'             | 5300.6681                         | 5300.6284                      | 0.0397                           | 7.482076                       |
| pUUAAGGCACGCGGUGAAp'            | 5629.7206                         | 5629.6949                      | 0.0257                           | 4.561505                       |
| pUUAAGGCACGCGGUGAAUp'           | 5935.7459                         | 5935.7009                      | 0.0450                           | 7.577818                       |
| pUUAAGGCACGCGGUGAAUGp'          | 6280.7933                         | 6280.7223                      | 0.0710                           | 11.30590                       |
| pUUAAGGCACGCGGUGAAUGCp'         | 6585.8346                         | 6585.7731                      | 0.0615                           | 9.338224                       |
| pUUAAGGCACGCGGUGAAUGCCp'        | 6890.8759                         | 6890.8150                      | 0.0609                           | 8.834871                       |
| pUUAAGGCACGCGGUGAAUGCCA         | 7157.9726                         | 7157.8839                      | 0.0887                           | 12.39737                       |
|                                 |                                   |                                |                                  | RMS = 5.7                      |

**Table S4**

| <b>3' Fragments of miR-124a</b> | <b>Theoretical Mass<br/>(m/z)</b> | <b>Observed Mass<br/>(m/z)</b> | <b>Mass Difference<br/>(m/z)</b> | <b>Mass Accuracy<br/>(ppm)</b> |
|---------------------------------|-----------------------------------|--------------------------------|----------------------------------|--------------------------------|
| GCCA                            | 1223.2340                         | 1223.2338                      | 0.0002                           | 0.196201                       |
| UGCCA                           | 1529.2593                         | 1529.2593                      | 0.0000                           | 0.026156                       |
| AUGCCA                          | 1858.3119                         | 1858.3117                      | 0.0002                           | 0.086100                       |
| AAUGCCA                         | 2187.3644                         | 2187.3645                      | -0.0001                          | -0.054861                      |
| GAAUGCCA                        | 2532.4118                         | 2532.4133                      | -0.0015                          | -0.588372                      |
| UGAAUGCCA                       | 2838.4371                         | 2838.4385                      | -0.0014                          | -0.489706                      |
| GUGAAUGCCA                      | 3183.4846                         | 3183.4851                      | -0.0005                          | -0.172767                      |
| GGUGAAUGCCA                     | 3528.5320                         | 3528.5285                      | 0.0035                           | 0.986246                       |
| CGGUGAAUGCCA                    | 3833.5733                         | 3833.5679                      | 0.0054                           | 1.400782                       |
| GCGGUGAAUGCCA                   | 4178.6207                         | 4178.6149                      | 0.0058                           | 1.388018                       |
| CGCGGUGAAUGCCA                  | 4483.6620                         | 4483.6397                      | 0.0223                           | 4.971383                       |
| ACGCGGUGAAUGCCA                 | 4812.7145                         | 4812.6943                      | 0.0202                           | 4.199293                       |
| CACGCGGUGAAUGCCA                | 5117.7558                         | 5117.7402                      | 0.0156                           | 3.048211                       |
| GCACGCGGUGAAUGCCA               | 5462.8032                         | 5462.7601                      | 0.0431                           | 7.895214                       |
| GGCACGCGGUGAAUGCCA              | 5807.8507                         | 5807.7881                      | 0.0626                           | 10.77163                       |
| AGGCACGCGGUGAAUGCCA             | 6136.9032                         | 6136.8277                      | 0.0755                           | 12.29936                       |
| AAGGCACGCGGUGAAUGCCA            | 6465.9557                         | 6465.8820                      | 0.0737                           | 11.39816                       |
| UAAGGCACGCGGUGAAUGCCA           | 6771.9810                         | 6771.8908                      | 0.0902                           | 13.32107                       |
| pUUAAGGCACGCGGUGAAUGCCA         | 7157.9726                         | 7157.8839                      | 0.0887                           | 12.39737                       |
|                                 |                                   |                                |                                  | RMS = 6.7                      |
