# Supplementary figures and images for: Bottom-up mass spectrometric sequencing of microRNA
Source: Royal Society of Chemistry journal article supplement (doi:10.1039/c4ay01519c), 2014-01-01

**Figure S1**

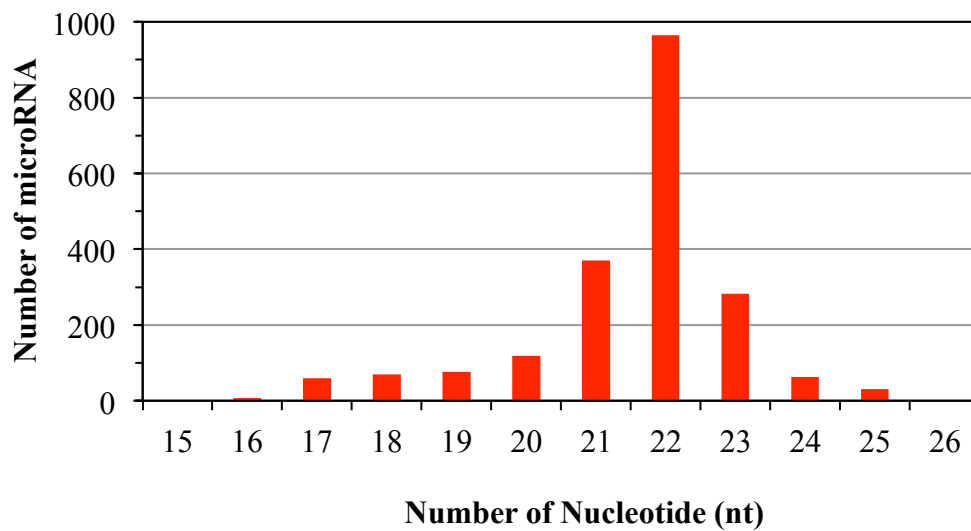

**Figure S2**

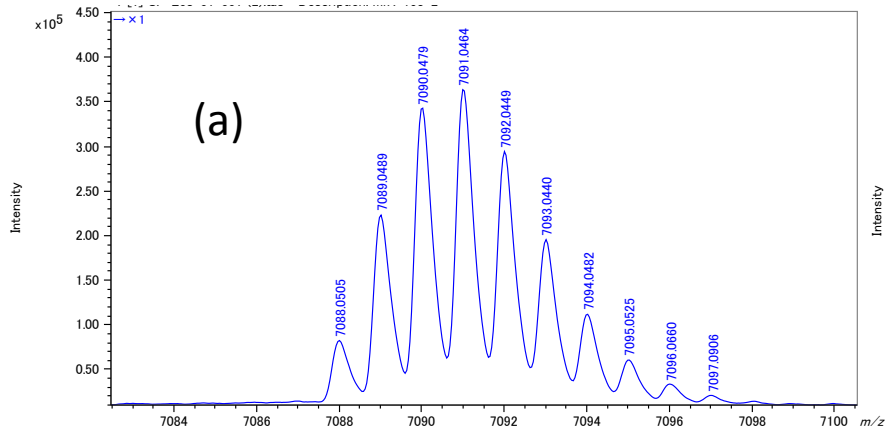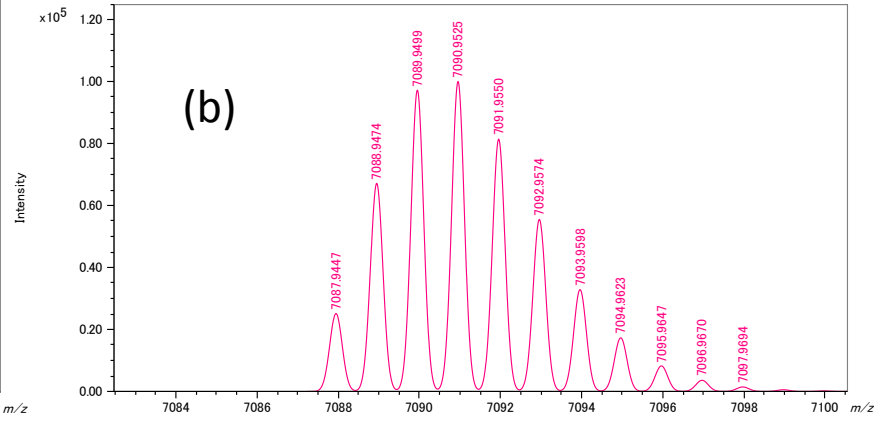

**Figure S3**

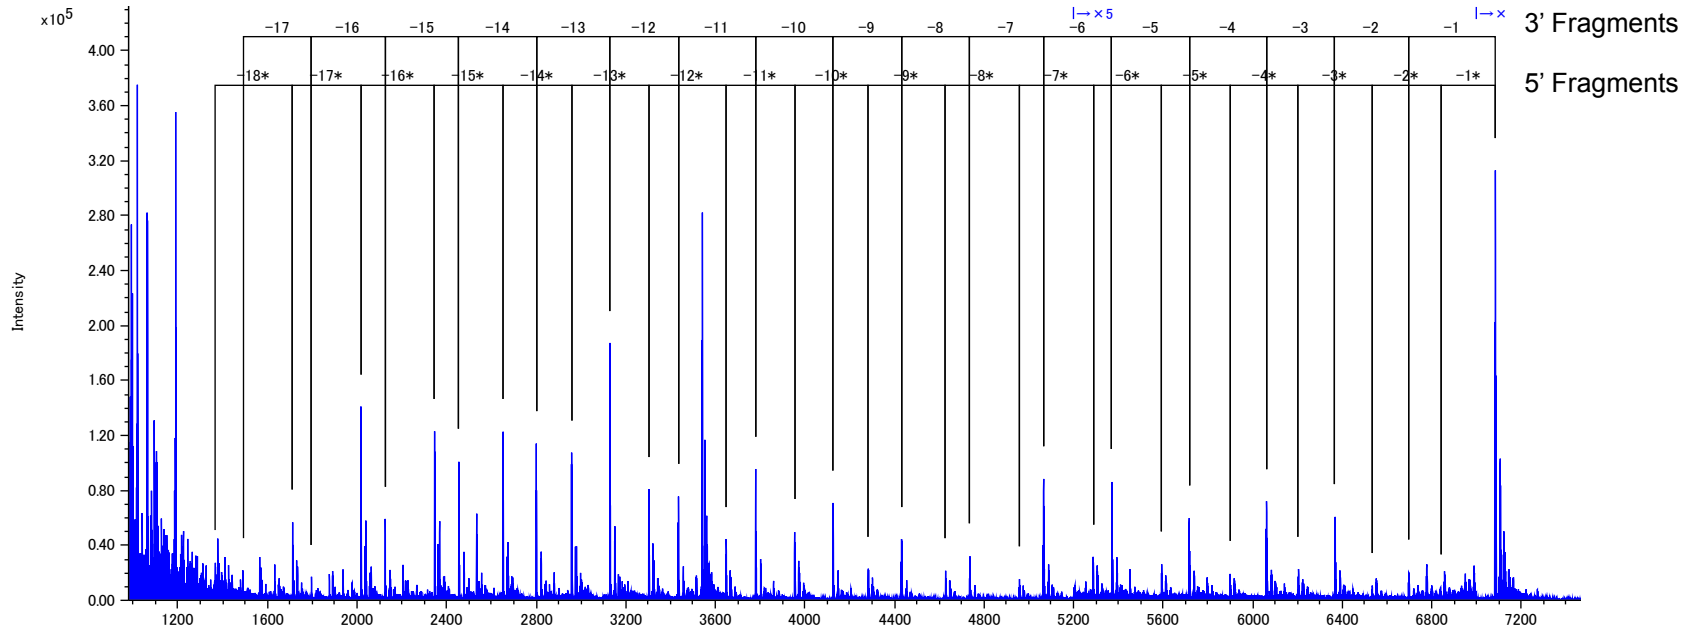

**Figure S4**

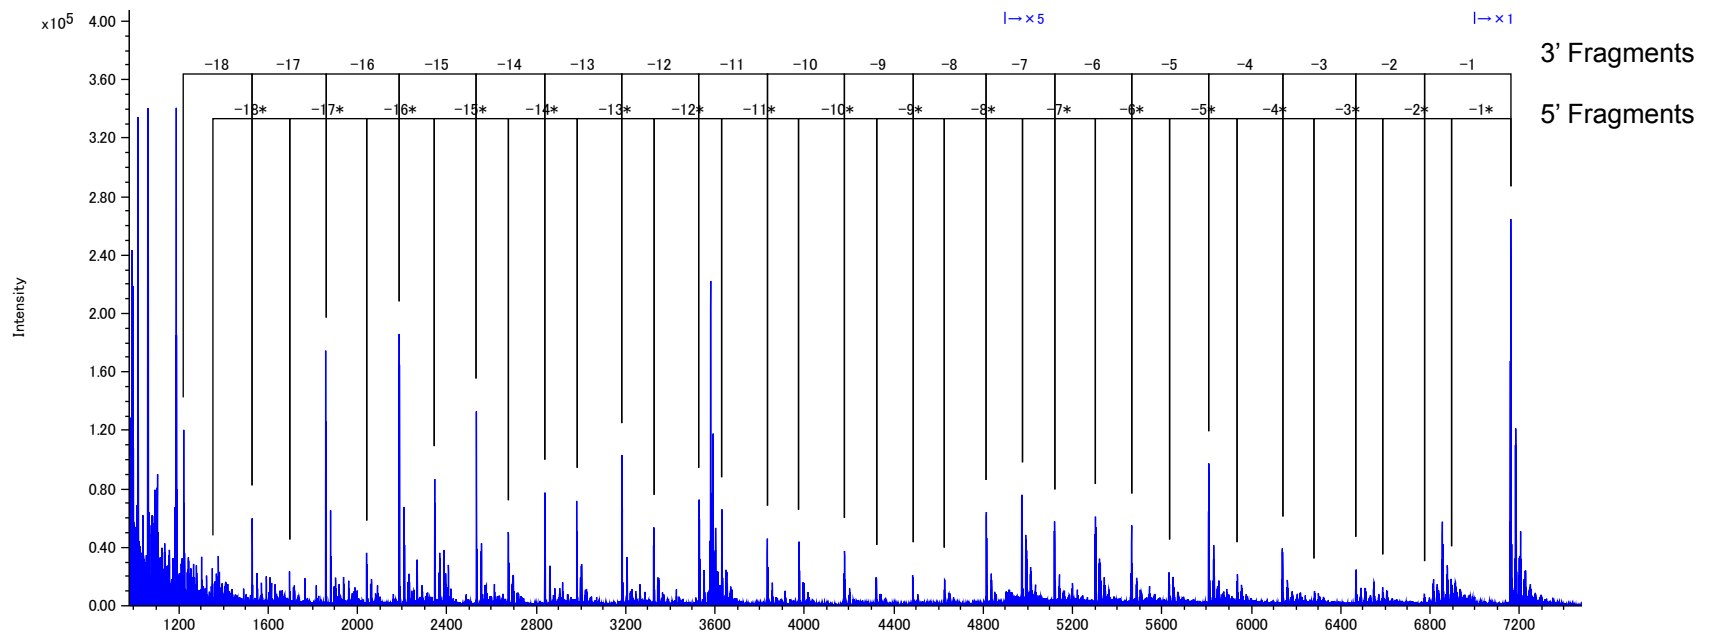

Supplement: c4ay01519c1.pdf [file c4ay01519c1.pdf]
